# Supplementary material
Source: publisher figshare collection journal article supplement (https://tandf.figshare.com/articles/dataset/_/7037528)
Supplement: Supplementary file 1 [file 1]

# Mammalian and Marsupial Protamine P1 Sequences

## Primates

|                                                               |       |       |            |                   |              |            |
|---------------------------------------------------------------|-------|-------|------------|-------------------|--------------|------------|
| Human ( <i>Homo sapien</i> )                                  | ARYRC | GRSQ  | SRSRYRQ    | RQSRRRRRRSCQTRR   | RAMRCGR      | PRYRRCRRH  |
| Lar Gibbon ( <i>Hylobates Lar</i> )                           | ARYRC | GRSQ  | SRSRCYRR   | GQSRRRRRRRSCQTRR  | RAMRCGR      | PRYRLRRRRH |
| Chimpanzee ( <i>Pan troglodytes</i> )                         | ARYRC | GRSQ  | SRSRCYRQ   | RQSRRRRRRRSCQTRR  | RAMRCGR      | RRSMRRRRH  |
| Gorilla ( <i>Gorilla gorilla</i> )                            | ARYRC | GRSQ  | SRSRCYRQ   | RQTSRRRRRRSCQTRR  | RAMRCGR      | RRNRLRRRRH |
| Bornean orangutan ( <i>Pongo pygmaeus</i> )                   | ARYRC | GRSQ  | SQSRCRRR   | RQRCHRRRRRRSCQTRR | RAMRCGR      | RRYRLRRRRH |
| Sumatran orangutan ( <i>Pongo abelii</i> )                    | ARYRC | GRSQ  | SQSRCRRR   | RQRCHRRRRRRSCQTRR | RAMRCGR      | RRYRLRRRRH |
| Olive baboon ( <i>Papio anubis</i> )                          | ARYRC | GRSQ  | SRSRCRRR   | RRRCRRRRRRRCARR   | RAMRCGR      | RRYRLRRRRH |
| Yellow baboon ( <i>Papio cynocephalus</i> )                   | ARYRC | GRSQ  | SRSRCRRR   | RRRCRRRRRRRCARR   | RAMRCGR      | RRYRLRRRRH |
| Rhesus macaque ( <i>Rhesus macaque</i> )                      | ARYRC | GRSQ  | SRSRCRRR   | RRRCRRRRRRRCARR   | RAMRCGR      | RRYRLRRRRH |
| Crab eating macaque ( <i>Macaca fascicularis</i> )            | ARYRC | GRSQ  | SRSRCRRR   | RRRCRRRRRRRCARR   | RAMRCGR      | RRYRLRRRRH |
| Bonobo ( <i>Pan paniscus</i> )                                | ARYRC | GRSQ  | SRSRCYRQ   | RRSRRRRRRRSCQTRR  | RAMRCGR      | RRSRLRRRRH |
| Silvered leaf monkey ( <i>Trachypithecus cristatus</i> )      | ARYRC | GRSQ  | SRSRCRRP   | RRRCRRRRRRRCARR   | RATRCGR      | RRYRLRRRRH |
| Francois's langur ( <i>Trachypithecus francoisi</i> )         | ARYRC | GRSQ  | SRSRCRRP   | RRRCRRRRRRRCARR   | RATRCGR      | RRYRLRRRRH |
| Golden langur ( <i>Trachypithecus geei</i> )                  | ARYRC | GRSQ  | SRSRCRRP   | RRRCRRRRRRRCARR   | RATRCGR      | RRYRLRRRRH |
| Indochinese lutung ( <i>Trachypithecus germaini</i> )         | ARYRC | GRSQ  | SRSRCRRP   | RRRCRRRRRRRCARR   | RATRCGR      | RRYRLRRRRH |
| Nilgiri langur ( <i>Trachypithecus johnii</i> )               | ARYRR | CRSQ  | SRSRCRRP   | RRRCRRRRRRRCARR   | RATRCGR      | RRYRLRRRRH |
| Dusky Leaf Monkey ( <i>Trachypithecus obscurus</i> )          | ARYRC | GRSQ  | SRSRCRRP   | RRRCRRRRRRRCARR   | RATRCGR      | RRYRLRRRRH |
| Phayre's langur ( <i>Trachypithecus phayrei</i> )             | ARYRC | GRSQ  | SRSRCRRP   | RRRCRRRRRRRCARR   | RATRCGR      | RRYRLRRRRH |
| Capped langur ( <i>Trachypithecus pileatus</i> )              | ARYRC | GRSQ  | SRSRCRRP   | RRRCRRRRRRRCARR   | RATRCGR      | RRYRLRRRRH |
| Purple-faced langur ( <i>Trachypithecus vetulus</i> )         | ARYRR | CRSQ  | SRSRCRRP   | RRRCRRRRRRRCARR   | RATRCGR      | RRYRLRRRRH |
| Northern plains gray langur ( <i>Semnopithecus entellus</i> ) | ARYRR | CRSQ  | SRSRCRRP   | RRRCRRRRRRRCARR   | RATRCGR      | RRYRLRRRRH |
| Marmoset ( <i>Callithrix jacchus</i> )                        | ARYRC | GRSQ  | SRSRCYRQ   | RRRGRRRRRRRCARR   | RASRCGR      | RRYKLPGRY  |
| Western red colobus ( <i>Ptilocolobus badius</i> )            | ARYRC | GRSQ  | SRSRCRRR   | RRRCRRRRRRRCARR   | TAMRCGR      | RRYRLRRRRH |
| Green monkey ( <i>Chlorocebus sabaeus</i> )                   | ARYRC | GRSQ  | SRSRCRRR   | RRRCRRRRRRRCARR   | RAMYCR       | RRYRLRRRRH |
| Emperor tamarin ( <i>Saguinus imperator</i> )                 | ARYRC | GRSQ  | SRSRCYRQ   | RRRGRRRRRRRCARR   | RASRCGR      | RRYKLPGRY  |
| Brown spider monkey ( <i>Ateles hybridus</i> )                | ARYRC | GRSR  | SRSRCYRQ   | RRPCRRRRRRRCARR   | RGSRCGR      | RRYRLRRRRH |
| Northern greater galago ( <i>Otolemur garnettii</i> )         | ARYRC | GRSQ  | SRSRCRRR   | RRRCRRRRRRRCARR   | RCRRRY       | RLRRRRH    |
| Squirrel monkey ( <i>Saimiri sciureus</i> )                   | ARYRC | GRSR  | SRSRCYRQ   | RRRCRRRRRRRCARR   | RARRCGR      | RRYRLRRRRH |
| Mantled guereza ( <i>Colobus guereza</i> )                    | ARYRC | RRSQ  | SRSRCRRR   | RRRCRRRRRRRCARR   | RAMRCGR      | RRYRLRRRRH |
| Venezuelan red howler monkey ( <i>Alouatta seniculus</i> )    | ARYRC | GRSRL | SRSRCYRQ   | RRPCRRRRRRRCARR   | RASRCGR      | RRYRLRRRRH |
| Malayan flying lemur ( <i>Galeopterus variegatus</i> )        | ARYRC | GRSR  | SR-CRRR    | RRSCRRRRRRRCARR   | RARRSCRRRYSL | RCRRY      |
| Proboscis monkey ( <i>Nasalis larvatus</i> )                  | AKSRC | GRSQ  | SRSRCRRR   | RQRCRRRRRRRCARR   | RAMRCGR      | RRYRLRRRRH |
| Ma's night monkey ( <i>Aotus nancymaeae</i> )                 | ARHRC | GRSR  | SQSRRRRDRQ | KRRCTPRRRRRRCARR  | RRCGRRR      | YKPRCRRN   |

## Proboscids

|                                                     |       |      |          |                  |        |          |
|-----------------------------------------------------|-------|------|----------|------------------|--------|----------|
| African bush elephant ( <i>Loxodonta africana</i> ) | ARYRC | GRSR | SRSRCRRR | RRRSHRRRRRRRCARR | RRCGR  | RRHR     |
| Asian elephant ( <i>Elephas maximus</i> )           | ARYRC | GRSR | SRSRCRRR | RRRSHRRRRRRRCARR | TRRCGR | RRYSLRRY |

## Artiodactyles

|                                                        |       |      |          |                  |            |       |
|--------------------------------------------------------|-------|------|----------|------------------|------------|-------|
| Pygmy hippopotamus ( <i>Hexaprotodon liberiensis</i> ) | ARYRC | GRSP | SRSRCRRQ | RRRCRRRRRRRCQRRR | RVCCRRYTMV | RCTRQ |
| Common hippopotamus ( <i>Hippopotamus amphibius</i> )  | ARYRC | GRSP | SRSRCRRQ | RRRCRRRRRRRCQRRR | RVCCRRYTMV | RCTRQ |
| Eurasian wild pig ( <i>Sus scrofa</i> )                | ARYRC | GRSH | SRSRCRRP | RRRCRRRRRRRCQRRR | AVCCRRYT   | VICRR |
| Red river hog ( <i>Potamochoerus porcus</i> )          | ARYRC | GRSH | SRSRCRRP | RRRCRRRRRRRCQRRR | AVCCRRYT   | VICRR |
| Musk deer ( <i>Moschus sp.</i> )                       | ARYRC | CLTH | SRSRCRRR | RRRCRRRRRRRCQRRR | RVCCRRYTMV | RCTRQ |
| Tufted deer ( <i>Elaphodus cephalopus</i> )            | ARYRC | CLTH | SRSRCRRR | RRRCRRRRRRRCQRRR | RVCCRRYTMV | RCTRQ |
| White-tailed deer ( <i>Odocoileus virginianus</i> )    | ARYRC | CLTH | SRSRCRRR | RRRCRRRRRRRCQRRR | RVCCRRYTMV | RCTRQ |
| Moose ( <i>Alces alces</i> )                           | ARYRC | CLTH | SRSRCRRR | RRRCRRRRRRRCQRRR | RVCCRRYTMV | RCTRQ |
| Elk/Red deer ( <i>Cervus elaphus</i> )                 | ARYRC | CLTH | SRSRCRRR | RRRCRRRRRRRCQRRR | RVCCRRYTMV | RCTRQ |
| Antelope gazelle ( <i>Gazella dorcas</i> )             | ARYRC | CLTH | SRSRCRRR | RRRCRRRRRRRCQRRR | RVCCRRYTMV | RCTRQ |
| Arabian camel ( <i>Camelus dromedarius</i> )           | ARYRC | GRSH | SRSRCRRP | RRRCRRRRRRRCQRRR | RVCCRRYTMV | RCTRQ |
| Pronghorn ( <i>Antilocapra americana</i> )             | ARYRC | CLTH | SRSRCRRR | RRRCRRRRRRRCQRRR | RVCCRRYTMV | RCTRQ |
| Domestic sheep ( <i>Ovis aries</i> )                   | ARYRC | CLTH | SRSRCRRR | RRRCRRRRRRRCQRRR | RVCCRRYTMV | RCTRQ |
| Thinhorn sheep ( <i>Ovis dalli</i> )                   | ARYRC | CLTH | SRSRCRRR | RRRCRRRRRRRCQRRR | RVCCRRYTMV | RCTRQ |
| Domestic goat ( <i>Capra hircus</i> )                  | ARYRC | CLTH | SRSRCRRR | RRRCRRRRRRRCQRRR | RVCCRRYTMV | RCTRQ |
| Domestic bull ( <i>Bos taurus</i> )                    | ARYRC | CLTH | SRSRCRRR | RRRCRRRRRRRCQRRR | RVCCRRYTMV | RCTRQ |
| Zebu ( <i>Bos indicus</i> )                            | ARYRC | CLTH | SRSRCRRR | RRRCRRRRRRRCQRRR | RVCCRRYTMV | RCTRQ |

## Perissodactyls

|                                                      |       |      |          |                  |            |       |
|------------------------------------------------------|-------|------|----------|------------------|------------|-------|
| African wild ass ( <i>Equus africanus</i> )          | ARYRC | GRSQ | SQSRCRRR | RRRCRRRRRRRCQRRR | RVCCRRYTMV | RCTRQ |
| Horse ( <i>Equus caballus</i> )                      | ARYRC | GRSQ | SQSRCRRR | RRRCRRRRRRRCQRRR | RVCCRRYTMV | RCTRQ |
| Grevy's zebra ( <i>Equus grevyi</i> )                | ARYRC | GRSQ | SQSRCRRR | RRRCRRRRRRRCQRRR | RVCCRRYTMV | RCTRQ |
| Common zebra ( <i>Equus quagga boehmi</i> )          | ARYRC | GRSQ | SQSRCRRR | RRRCRRRRRRRCQRRR | RVCCRRYTMV | RCTRQ |
| Przewalski's horse ( <i>Equus ferus przewalski</i> ) | ARYRC | GRSQ | SQSRCRRR | RRRCRRRRRRRCQRRR | RVCCRRYTMV | RCTRQ |

## Carnivores

|                                                 |       |      |          |                  |            |       |
|-------------------------------------------------|-------|------|----------|------------------|------------|-------|
| Domestic dog ( <i>Canis lupus familiaris</i> )  | ARYRC | GRSQ | SRSRCRRR | RRRCRRRRRRRCQRRR | RVCCRRYTMV | RCTRQ |
| Domestic cat ( <i>Felis catus</i> )             | ARYRC | GRSH | SRSRCRRR | RRRCRRRRRRRCQRRR | RVCCRRYTMV | RCTRQ |
| American black bear ( <i>Ursus americanus</i> ) | ARYRC | GRSH | SRSRCRRR | RRRCRRRRRRRCQRRR | RVCCRRYTMV | RCTRQ |

## Lagomorphs

|                                                     |       |      |          |                  |            |       |
|-----------------------------------------------------|-------|------|----------|------------------|------------|-------|
| New Zealand rabbit ( <i>Oryctolagus cuniculus</i> ) | VRYRC | GRSQ | SRSRCRRR | RRRCRRRRRRRCQRRR | RKCCRRYTMV | RCRRY |
|-----------------------------------------------------|-------|------|----------|------------------|------------|-------|

## Cetaceans

|                                                               |       |      |          |                  |            |       |
|---------------------------------------------------------------|-------|------|----------|------------------|------------|-------|
| Pygmy Right whale ( <i>Caperea marginata</i> )                | ARNRC | GRSQ | SRSRRRRP | RQRCRSQRRRCQRRR  | RVCCRRYTMV | RCARR |
| Bowhead whale ( <i>Balaena mysticetus</i> )                   | ARNRC | GRSQ | SRSRRRRP | RQRCRSQRRRCQRRR  | RVCCRRYTMV | RCARR |
| Southern Right whale ( <i>Eubalaena australis</i> )           | ARNRC | GRSQ | SRSRRRRP | RQRCRSQRRRCQRRR  | RVCCRRYTMV | RCARR |
| Black Right whale ( <i>Eubalaena glacialis</i> )              | ARNRC | GRSQ | SRSRRRRP | RQRCRSQRRRCQRRR  | RVCCRRYTMV | RCARR |
| North Atlantic Right whale ( <i>Eubalaena japonica</i> )      | ARNRC | GRSQ | SRSRRRRP | RQRCRSQRRRCQRRR  | RVCCRRYTMV | RCARR |
| Baird's beaked whale ( <i>Berardius bairdii</i> )             | ARNRC | GRSQ | SQSRRRRP | RRRRRSRRRRRCQRRR | RVCCRRYTMV | RCARR |
| Shepherd's beaked whale ( <i>Tasmacetus shepherdi</i> )       | ARNRC | GRSQ | SQSRRRRP | RRRRRSRRRRRCQRRR | RVCCRRYTMV | RCARR |
| Sowerby's beaked whale ( <i>Mesoplodon bidens</i> )           | ARNRC | GRSQ | SQSRRRRP | RRRRRSRRRRRCQRRR | RVCCRRYTMV | RCARR |
| Gray's beaked whale ( <i>Mesoplodon grayi</i> )               | ARNRC | GRSQ | SQSRRRRP | RRRRRSRRRRRCQRRR | RVCCRRYTMV | RCARR |
| Lesser beaked whale ( <i>Mesoplodon peruvianus</i> )          | ARNRC | GRSQ | SQSRRRRP | RRRRRSRRRRRCQRRR | RVCCRRYTMV | RCARR |
| Humpback whale ( <i>Megaptera novaeangliae</i> )              | ARNRC | CRSP | SRSRRRRP | RQRCRSQRRRCQRRR  | RVCCRRYTMV | RCARR |
| Minke whale ( <i>Balaenoptera acutorostrata</i> )             | ARNRC | CRSP | SRSRRRRP | RQRCRSQRRRCQRRR  | RVCCRRYTMV | RCARR |
| Antarctic minke whale ( <i>Balaenoptera bonaerensis</i> )     | ARNRC | CRSP | SRSRRRRP | RQRCRSQRRRCQRRR  | RVCCRRYTMV | RCARR |
| Sei whale ( <i>Balaenoptera borealis</i> )                    | ARNRC | CRSP | SRSRRRRP | RQRCRSQRRRCQRRR  | RVCCRRYTMV | RCARR |
| Bryde's whale ( <i>Balaenoptera edeni</i> )                   | ARNRC | CRSP | SRSRRRRP | RQRCRSQRRRCQRRR  | RVCCRRYTMV | RCARR |
| Blue whale ( <i>Balaenoptera musculus</i> )                   | ARNRC | CRSP | SRSRRRRP | RQRCRSQRRRCQRRR  | RVCCRRYTMV | RCARR |
| Fin whale ( <i>Balaenoptera physalus</i> )                    | ARNRC | CRSP | SRSRRRRP | RQRCRSQRRRCQRRR  | RVCCRRYTMV | RCARR |
| Cuvier's beaked whale ( <i>Ziphius cavirostris</i> )          | ARNRC | GRGQ | SQSRRRRP | RRRRRSRRRRRCQRRR | RVCCRRYTMV | RCARR |
| Gray whale ( <i>Eschrichtius robustus</i> )                   | ARNRC | CRSP | SRSRRRRP | RQRCRSQRRRCQRRR  | RVCCRRYTMV | RCARR |
| Sperm whale ( <i>Physeter catodon</i> )                       | ARNRC | GRSQ | SRSRCRRP | RRRCRRRRRRRCQRRR | RVCCRRYTMV | RCARR |
| Dwarf sperm whale ( <i>Kogia sima</i> )                       | ARNRC | GRSQ | SRGRCRRP | RRRCRRRRRRRCQRRR | RVCCRRYTMV | RCARR |
| Pygmy sperm whale ( <i>Kogia breviceps</i> )                  | ARNRC | GRSQ | SRGRCRRP | RRRCRRRRRRRCQRRR | RVCCRRYTMV | RCARR |
| Narwhale ( <i>Monodon monoceros</i> )                         | ARNRC | CRSP | SQSRRRRP | RRRCRRRRRRRCQRRR | RVCCRRYTMV | RCARR |
| Beluga whale ( <i>Delphinapterus leucas</i> )                 | ARNRC | CRSP | SQSRRRRP | RRRCRRRRRRRCQRRR | RVCCRRYTMV | RCARR |
| Killer whale ( <i>Orcinus orca</i> )                          | ARNRC | CRSP | SQSRRRRP | RRRCRRRRRRRCQRRR | RVCCRRYTMV | RCARR |
| Melon headed whale ( <i>Peponocephala electra</i> )           | ARNRC | CRSP | SQSRRRRP | RRRCRRRRRRRCQRRR | RVCCRRYTMV | RCARR |
| False killer whale ( <i>Pseudorca crassidens</i> )            | ARNRC | CRSP | SQSRRRRP | RRRCRRRRRRRCQRRR | RVCCRRYTMV | RCARR |
| Pygmy killer whale ( <i>Feresa attenuata</i> )                | ARNRC | CRSP | SQSRRRRP | RRRCRRRRRRRCQRRR | RVCCRRYTMV | RCARR |
| Short-finned pilot whale ( <i>Globicephala macrohynchus</i> ) | ARNRC | CRSP | SQSRRRRP | RRRCRRRRRRRCQRRR | RVCCRRYTMV | RCARR |



|                                                                        |                                                                                                                                                             |
|------------------------------------------------------------------------|-------------------------------------------------------------------------------------------------------------------------------------------------------------|
| Red-necked wallaby ( <i>Macropus rufogriseus</i> )                     | A R Y R H - S R S R - - S R S R Y R R R R - R R R S R Y S R R R R Y R G R R R R - R S R R G R R R R G Y S - - R R R Y S R - - - - R R R R R Y - - - - -     |
| Whiptail wallaby ( <i>Macropus parryi</i> )                            | A R Y R H - S R S R - - S R S R Y R R R R - R R R S R Y S R R R R Y R G R R R R ? R S R R G R R - R G Y S - - R R R Y S R - - - - R R R R R Y - - - - -     |
| Rufous hare-wallaby ( <i>Lagorchestes hirsutus</i> )                   | A R Y R H - S R S R - - S R S G Y R Q R - R R R S R Y S R R R R Y R R Q R - - - R S R R G R R R G Y S - - R R R Y S R R R Y S R R R R R Y - - - - -         |
| Kultarr ( <i>Antechinus laniger</i> )                                  | A R Y R H S R S R - - S R S Y R R R R - R R S R H H N R R T Y R - R S R R H S R R R R G R R R G Y S - - R R R Y S R R G - - - - R R R Y - - - - -           |
| Fawn antechinus ( <i>Antechinus bellus</i> )                           | A R Y R H S R S R - - S R S Y R R R R R - R R S R H H N R R T Y R - R S R R H S R R R R G R R R G Y S - - R R R Y S R R G - - - - R R R Y - - - - -         |
| Yellow-footed antechinus ( <i>Antechinus flavipes</i> )                | A R Y R H S R S R - - S R S Y R R R R R - R S R H H N R R T Y R - R S R R H S R R R R G R R R G Y S - - R R R Y S R R G - - - - R R R Y - - - - -           |
| Atherton antechinus ( <i>Antechinus godmani</i> )                      | A R Y R H S R S R - - S R S Y R R R R R - R S R H H N R R T Y R - R S R R H S R R R R G R R R G Y S - - R R R Y S R R G - - - - R R R Y - - - - -           |
| Cinnamon antechinus ( <i>Antechinus leo</i> )                          | A R Y R H S R S R - - S R S Y R R R R R - R S R H H N R R T Y R - R S R R H S R R R R G R R R G Y S - - R R R Y S R R G - - - - R R R Y - - - - -           |
| Swamp antechinus ( <i>Antechinus minimus</i> )                         | A R Y R H S R S R - - S R S Y R R R R R - R S R H H N R R T Y R - R S R R H S R R R R G R R R G Y S - - R R R Y S R R G - - - - R R R Y - - - - -           |
| Long-nosed antechinus ( <i>Antechinus naso</i> )                       | A R Y R H S R S R - - S R S Y R R R R R - R S R H H N R R T Y R - R S R R H S R R R R G R R R G Y S - - R R R Y S R R G - - - - R R R Y - - - - -           |
| Brown antechinus ( <i>Antechinus stuartii</i> )                        | A R Y R H S R S R - - S R S Y R R R R R - R S R H H N R R T Y R - R S R R H S R R R R G R R R G Y S - - R R R Y S R R G - - - - R R R Y - - - - -           |
| Dusky antechinus ( <i>Antechinus swainsonii</i> )                      | A R Y R H S R S R - - S R S Y R R R R R - R S R G R - R R T Y R - R S R R H S R R R R G R R R G Y S - - R R R Y S R R G - - - - R R R Y - - - - -           |
| Crest-tailed mulgara ( <i>Dasyiscercis cristicauda</i> )               | A R Y R H S R S R - - S R S Y R R R R R - R S R H H N R R T Y R - R S R R H S R R R R G R R R G Y S - - R R R Y S R R G - - - - R R R Y - - - - -           |
| Little red kaluta ( <i>Dasykaluta rosamondae</i> )                     | A R Y R H S R S R - - S R S Y R R R R R - R S R H H N R R T Y R - R S R R H S R R R R G R R R G Y S - - R R R Y S R R G - - - - R R R Y - - - - -           |
| Kowari ( <i>Dasyuroides byrnei</i> )                                   | A R Y R H S R S R - - S R S Y R R R R R - R S R H H N R R T Y R - R S R R H S R R R R G R R R G Y S - - R R R Y S R R G - - - - R R R Y - - - - -           |
| Northern quoll ( <i>Dasyurus hallucatus</i> )                          | A R Y R R S R S R - - S R S Y R R R R R - R S R G R - R R T Y R - R S R R H S R R R R G R R R G Y S - - R R R Y S R R G - - - - R R R - - - - -             |
| Eastern quoll ( <i>Dasyurus viverrinus</i> )                           | A R Y R R S R S R - - S R S Y R R R R R - R S R G R - R R T Y R - R S R R H S R R R R G R R R G Y S - - R R R Y S R R G - - - - R R R - - - - -             |
| New Guinean quoll ( <i>Dasyurus albonipunctatus</i> )                  | A R Y R H S R S R - - S R S Y R R R R R - R S R G R - R R T Y R - R S R R H S R R R R G R R R G Y S - - R R R Y S R R G - - - - R R R Y - - - - -           |
| Western quoll ( <i>Dasyurus geoffroii</i> )                            | A R Y R H S R S R - - S R S Y R R R R R - R S R G R - R R T Y R - R S R R H S R R R R G R R R G Y S - - R R R Y S R R G - - - - R R R Y - - - - -           |
| Bronze quoll ( <i>Dasyurus spartacus</i> )                             | A R Y R H S R S R - - S R S Y R R R R R - R S R G R - R R T Y R - R S R R H S R R R R G R R R G Y S - - R R R Y S R R G - - - - R R R Y - - - - -           |
| Tiger quoll ( <i>Dasyurus maculatus</i> )                              | A R Y R H S R S R - - S R S Y R R R R R - R S R G R - R R T Y R - R S R R H S R R R R G R R R G Y S - - R R R Y S R R G - - - - R R R Y - - - - -           |
| Habbema dasyure ( <i>Micromurexia habbema</i> )                        | A R Y R H S R S R - - S R S Y R R R R R - R S R H H N R R T Y R - R S R R H S R R R R G R R R G Y S - - R R R Y S R R G - - - - R R R Y - - - - -           |
| Black-tailed dasyure ( <i>Murexichinus melanurus</i> )                 | A R Y R H S R S R - - S R S Y R R R R R - R S R H H N R R T Y R - R S R R H S R R R R G R R R G Y S - - R R R Y S R R G - - - - R R R Y - - - - -           |
| Short-furred dasyure ( <i>Murexia longicauda</i> )                     | A R Y R H S R S R - - S R S Y R R R R R - R S R H H N R R T Y R - R S R R H S R R R R G R R R G Y S - - R R R Y S R R G - - - - R R R Y - - - - -           |
| Three-striped dasyure ( <i>Myoictis melas</i> )                        | A R Y R H S R S R - - S R S Y R R R R R - R S R H H N R R T Y R - R S R R H S R R R R G R R R G Y S - - R R R Y S R R G - - - - R R R Y - - - - -           |
| Wallace's dasyure ( <i>Myoictis wallacei</i> )                         | A R Y R H S R S R - - S R S Y R R R R R - R S R H H N R R T Y R - R S R R H S R R R R G R R R G Y S - - R R R Y S R R G - - - - R R R Y - - - - -           |
| Speckled dasyure ( <i>Neophascolagus lorentzii</i> )                   | A R Y R H S R S R - - S R S Y R R R R R - R S R G R - R R T Y R - R S R R H S R R R R G R R R G Y S - - R R R Y S R R G - - - - R R R Y - - - - -           |
| Wongai ningau ( <i>Ningau riedi</i> )                                  | A R Y R H S R S R - - S R S Y R R R R R - R S R H H N R R T Y R - R S R R H S R R R R G R R R G Y S - - R R R Y S R R G - - - - R R R Y - - - - -           |
| Pilbara ningau ( <i>Ningau timealeyi</i> )                             | A R Y R H S R S R - - S R S Y R R R R R - R S R H H N R R T Y R - R S R R H S R R R R G R R R G Y S - - R R R Y S R R G - - - - R R R Y - - - - -           |
| Southern ningau ( <i>Ningau yvonneae</i> )                             | A R Y R H S R S R - - S R S Y R R R R R - R S R H H N R R T Y R - R S R R H S R R R R G R R R G Y S - - R R R Y S R R G - - - - R R R Y - - - - -           |
| Broad-striped dasyure ( <i>Paramurexia rothschildi</i> )               | A R Y R H S R S R - - S R S Y R R R R R - R S R H H N R R T Y R - R S R R H S R R R R G R R R G Y S - - R R R Y S R R G - - - - R R R Y - - - - -           |
| Dibbler ( <i>Parantechinus apicalis</i> )                              | A R Y R H S R S R - - S R S Y R R R R R - R S R H H N R R T Y R - R S R R H S R R R R G R R R G Y S - - R R R Y S R R G - - - - R R R Y - - - - -           |
| Red-tailed phascogale ( <i>Phascogale calura</i> )                     | A R Y R H S R S R - - S R S Y R R R R R - R S R H H N R R T Y R - R S R R H S R R R R G R R R G Y S - - R R R Y S R R G - - - - R R R Y - - - - -           |
| Brush-tailed phascogale ( <i>Phascogale tapoatafa</i> )                | A R Y R H S R S R - - S R S Y R R R R R - R S R H H N R R T Y R - R S R R H S R R R R G R R R G Y S - - R R R Y S R R G - - - - R R R Y - - - - -           |
| Narrow-striped marsupial shrew ( <i>Phascosorex dorsalis</i> )         | A R Y R H S R S R - - S R S Y R R R R R - R S R G R - R R T Y R - R S R R H S R R R R G R R R G Y S - - R R R Y S R R G - - - - R R R Y - - - - -           |
| Common planigale ( <i>Planigale maculate maculata</i> )                | A R Y R H S R S R - - S R S Y R R R R R - R S R H H N R R T Y R - R S R R H S R R R R G R R R G Y S - - R R R Y S R R G - - - - R R R Y - - - - -           |
| Dwarf planigale ( <i>Planigale maculate sinuatis</i> )                 | A R C R H S R S R - - S R S R N Q C Q R R - R R R - Y N R R R T Y R - R S R R H S R R R R G R R R G C S - - R R R Y S R R G - - - - R R R Y - - - - -       |
| Paucident planigale ( <i>Planigale gilesi</i> )                        | A R C R H S R S R - - S R S R N Q C Q R R - - R H Y N R R T Y R - R S R R H S R R R R V R R R G C S C - - R R R - C S R R R - - - - R R R C - - - - -       |
| Narro-nosed planigale ( <i>Planigale tenuirostris</i> )                | A R C R H I R S R - - S R S R N Q C Q R R - R S R H Y N R R T Y R - R S R R H S R R R R V R R R G C S C - - R R R - C S R R R - - - - R R R C - - - - -     |
| Sandstone false antechinus ( <i>Pseudantechinus bilarni</i> )          | A R Y R H S R S R - - S R S Y R R R R R - R S R H H N R R T Y R - R S R R H S R R R R G R R R G Y S - - R R R Y S R R G - - - - R R R - - - - -             |
| Fat-tailed false antechinus ( <i>Pseudantechinus macdonnellensis</i> ) | A R Y R H S R S R - - S R S Y R R R R R - R S R H H N R R T Y R - R S R R H S R R R R G R R R G Y S - - R R R Y S R R G - - - - R R R - - - - -             |
| Ningbing false antechinus ( <i>Pseudantechinus ningbing</i> )          | A R Y R H S R S R - - S R S Y R R R R R - R S R H H N R R T Y R - R S R R H S R R R R G R R R G Y S - - R R R Y S R R G - - - - R R R - - - - -             |
| Woolley's false antechinus ( <i>Pseudantechinus woolleyae</i> )        | A R Y R H S R S R - - S R S Y R R R R R - R S R H H N R R T Y R - R S R R H S R R R R G R R R G Y S - - R R R Y S R R G - - - - R R R - - - - -             |
| Tasmanian devil ( <i>Sarcophilus harrisii</i> )                        | A R Y R R S R S R - - S R S Y R R R R R - R S R G R - R R T Y R - R S R R H S R R R R G R R R G Y S - - R R R Y S R R G - - - - R R R - - - - -             |
| Grey-bellied dunnart ( <i>Sminthopsis griseoventer</i> )               | A R Y R R S R S R - - S R S Y R R R R R - R S R H H N R R T Y R - R S R R H S R R R R G R R R G Y S - - R R R Y S R R G - - - - R R R - - - - -             |
| Kakadu dunnart ( <i>Sminthopsis bini</i> )                             | A R Y R R S R S R - - S R S Y R R R R R - R S R H H N R R T Y R - R S R R H S R R R R G R R R G Y S - - R R R Y S R R G - - - - R R R - - - - -             |
| Long-tailed dunnart ( <i>Sminthopsis longicauda</i> )                  | A R Y R R S R S R - - S R S Y R R R R R - R S R H H N R R T Y R - R S R R H S R R R R G R R R G Y S - - R R R Y S R R - - - - R R R - - - - -               |
| Kangaroo Island dunnart ( <i>Sminthopsis aikeni</i> )                  | A R Y R R S R S R - - S R S Y R R R R R - R S R H H N R R T Y R - R S R R H S R R R R G R R R G Y S - - R R R Y S R R G - - - - R R R - - - - -             |
| Chestnut dunnart ( <i>Sminthopsis archeri</i> )                        | A R Y R R S R S R - - S R S Y R R R R R - R S R H H N R R T Y R - R S R R H S R R R R G R R R G Y S - - R R R Y S R R G - - - - R R R - - - - -             |
| Fat-tailed dunnart ( <i>Sminthopsis crassicauda</i> )                  | A R Y R R S R S R - - S R S Y R R R R R - R S R H H N R R T Y R - R S R R H S R R R R G R R R G Y S - - R R R Y S R R G - - - - R R R - - - - -             |
| Little long-tailed dunnart ( <i>Sminthopsis dolichura</i> )            | A R Y R R S R S R - - S R S Y R R R R R - R S R H H N R R T Y R - R S R R H S R R R R G R R R G Y S - - R R R Y S R R G - - - - R R R - - - - -             |
| Julia Creek dunnart ( <i>Sminthopsis douglasi</i> )                    | A R Y R R S R S R - - S R S Y R R R R R - R S R H H N R R T Y R - R S R R H S R R R R G R R R G Y S - - R R R Y S R R G - - - - R R R - - - - -             |
| Gilbert's dunnart ( <i>Sminthopsis gilberti</i> )                      | A R Y R R S R S R - - S R S Y R R R R R - R S R H H N R R T Y R - R S R R H S R R R R G R R R G Y S - - R R R Y S R R G - - - - R R R - - - - -             |
| White-tailed dunnart ( <i>Sminthopsis granlipipes</i> )                | A R Y R R S R S R - - S R S Y R R R R R - R S R H H N R R T Y R - R S R R H S R R R R G R R R G Y S - - R R R Y S R R G - - - - R R R - - - - -             |
| Hairy-footed dunnart ( <i>Sminthopsis hirtipes</i> )                   | A R Y R R S R S R - - S R S Y R R R R R - R S R H H N R R T Y R - R S R R H S R R R R G R R R G Y S - - R R R Y S R R G - - - - R R R - - - - -             |
| White-footed dunnart ( <i>Sminthopsis leucopus</i> )                   | A R Y R R S R S R - - S R S Y R R R R R - R S R H H N R R T Y R - R S R R H S R R R R G R R R G Y S - - R R R Y S R R G - - - - R R R - - - - -             |
| Striped-faced dunnart ( <i>Sminthopsis macroura</i> )                  | A R Y R R S R S R - - S R S Y R R R R R - R S R H H N R R T Y R - R S R R H S R R R R G R R R G Y S - - R R R Y S R R G - - - - R R R - - - - -             |
| Slender-tailed dunnart ( <i>Sminthopsis murina</i> )                   | A R Y R R S R S R - - S R S Y R R R R R - R S R H H N R R T Y R - R S R R H S R R R R G R R R G Y S - - R R R Y S R R G - - - - R R R - - - - -             |
| Ooldea dunnart ( <i>Sminthopsis ooldea</i> )                           | A R Y R R S R S R - - S R S Y R R R R R - R S R H H N R R T Y R - R S R R H S R R R R G R R R G Y S - - R R R Y S R R G - - - - R R R - - - - -             |
| Sandhill dunnart ( <i>Sminthopsis psammophila</i> )                    | A R Y R R S R S R - - S R S Y R R R R R - R S R H H N R R T Y R - R S R R H S R R R R G R R R G Y S - - R R R Y S R R G - - - - R R R - - - - -             |
| Red-cheeked dunnart ( <i>Sminthopsis virginiae</i> )                   | A R Y R R S R S R - - S R S Y R R R R R - R S R H H N R R T Y R - R S R R H S R R R R G R R R G Y S - - R R R Y S R R G - - - - R R R - - - - -             |
| Lesser hairy-footed dunnart ( <i>Sminthopsis youngsoni</i> )           | A R Y R R S R S R - - S R S Y R R R R R - R S R H H N R R T Y R - R S R R H S R R R R G R R R G Y S - - R R R Y S R R G - - - - R R R - - - - -             |
| Numbat ( <i>Myrmecobius fasciatus</i> )                                | A R Y R R S R S R - - S R S Y R R R R R - R S R H H N R R T Y R - R S R R H S R R R R G R R R G Y S - - R R R Y S R R G - - - - R R R - - - - -             |
| Thylacine ( <i>Thylacinus cynocephalus</i> )                           | A R Y R R H S R S - - S R S Y Q R R R - R R R S R Y S Q R R R Y R R G S R R R R R G R R R R G Y R - - R R Y S H S H - - - - R R - - R Y - - - - -           |
| Koala ( <i>Phascogale cinereus</i> )                                   | A R Y R H - S R S R - - S R S Y Q R R R - R R R S R Y S Q R R R Y R R G S R R R R R G R R R R G Y R - - R R Y S H S H - - - - R R - - R Y - - - - -         |
| Southern marsupial mole ( <i>Notoryctes typhlops</i> )                 | A R Y R H - S R S R - - S R S Y R R R R - R R R S R Y S Q R R R Y R R H R R S G R - - R R R G R R R R R G Y R - - R R Y H S H - - - - R R - - R Y - - - - - |
| Coppery ringtail possum ( <i>Pseudochirops cupreus</i> )               | A R Y R H - S R S R - - S R S Y R R R R R - R R R S R Y S R R R R Y R S R R R - - - - R R R G R R R G N C L G R R G Y R R R R Y S R R R R R Y - - - - -     |
| Long-footed potoroo ( <i>Potorous longipes</i> )                       | A R Y R H - S R S R - - S R N Y R R R R - R R R S R Y S R R R R Y R G S R R S R - S - S R R R R R R G Y S - - R R R Y S R - - - - R R R R Y - - - - -       |
| Eastern grey kangaroo ( <i>Macropus giganteus</i> )                    | A R Y R H - S R S R - - S R S Y R R R R - R R R S R Y S R R R R Y R G R R R R - - S R R G R R R R G Y S - - R R R Y S R - - - - R R R R Y - - - - -         |
| Brush-tailed bettong ( <i>Bettongia penicillata</i> )                  | A R Y R H - S R S R - - S R S Y R R R R - R R R S R Y S R R R R Y R G S R R R R - - S R R G R R R R G Y S - - R R R Y S R - - - - R R R R Y - - - - -       |
| Swamp wallaby ( <i>Wallabia bicolor</i> )                              | A R Y R H - S R S R - - S R S Y R R R R - R R R S R Y S R R R R Y R G R R R R - - S R R G R R R R G Y S - - R R R Y S R - - - - R R R R Y - - - - -         |
| Dorcopsis ( <i>Dorcopsis veterum</i> )                                 | A R Y R H - S R S R - - S R S Y R R R R - R R R S R Y S R R R R Y R G R R R R - - S R R G R R R R G Y S - - R R R Y S - - - - R R R R R Y - - - - -         |
| Small dorcopsis ( <i>Dorcopsulus vanheurni</i> )                       | A R Y R H - S R S R - - S R S Y R R R R - R R R S R Y S R R R R Y R G R R R R - - S R R G R R R R G Y S - - R R R Y S - - - - R R R R R Y - - - - -         |
| Bridled nail-tail wallaby ( <i>Onychogalea fraenata</i> )              | A R Y R H - S R S R - - S R S N Y R R R R N - R R R S R Y S R R R R Y R G R R R R - - S - R R G R R R G Y S - - R R R Y S R - - - - R R R R R Y - - - - -   |

**Supplemental Figure S1. Amino acid sequences for all known mammalian protamine P1 proteins.** The sequences have been aligned relative to human protamine P1, and the epitopic sequences recognized by the new anti-protamine MAbs are highlighted to identify those protamine P1's that are likely to be recognized. The sequences recognized by 2A11, 5A2, 5D1, and 11C1 are highlighted in blue (SRS), gray (RQR), purple (TRR) and brown (RCC). The sequences recognized by MAb 20D4 are highlighted green (ARY) and yellow (RSCR...RRRC, RSR...RRRC, and conserved variants). The YRP sequence recognized by MAb 26B11 is highlighted red. Only human P1 contains the YRP sequence, suggesting the MAb 26B11 will be human specific in its recognition of protamine P1. In contrast, the nearly universal presence of the ARY and/or RSCR...RRRC sequences suggest MAb 20D4 should recognize and bind to nearly every protamine P1 sequence except those of whales, dolphins and porpoises (cetaceans), MAbs 2A11, 5A2, 5D1, and 11C1 would be also expected to recognize and bind to the protamine P1's of most species of eutherian mammals and marsupials.
