# Supplementary material
Source: publisher figshare collection journal article supplement (https://tandf.figshare.com/articles/dataset/_/7037528)
Supplement: Supplementary file 3 [file 1]

## Monotreme, Bird and Reptile Protamine P1 Sequences (Human P1 is shown for comparison)

|                                                                                                                                                                                                                                                                                                                                                                                                                                                                                                                                                                                                                                                                                                                                                                                                                     |                                                                                                                                                                                                                                                                                                                                                                                                                                                                                                                                                                                                                                                                                                                                                                                                                                                                                                                                                                                                                                                                                                                                                                                                                                                                                                                                                                                                                                                                                                                                                                                                                                                                                                                                                                                                                                                                                                                                                                                                                                                                      |
|---------------------------------------------------------------------------------------------------------------------------------------------------------------------------------------------------------------------------------------------------------------------------------------------------------------------------------------------------------------------------------------------------------------------------------------------------------------------------------------------------------------------------------------------------------------------------------------------------------------------------------------------------------------------------------------------------------------------------------------------------------------------------------------------------------------------|----------------------------------------------------------------------------------------------------------------------------------------------------------------------------------------------------------------------------------------------------------------------------------------------------------------------------------------------------------------------------------------------------------------------------------------------------------------------------------------------------------------------------------------------------------------------------------------------------------------------------------------------------------------------------------------------------------------------------------------------------------------------------------------------------------------------------------------------------------------------------------------------------------------------------------------------------------------------------------------------------------------------------------------------------------------------------------------------------------------------------------------------------------------------------------------------------------------------------------------------------------------------------------------------------------------------------------------------------------------------------------------------------------------------------------------------------------------------------------------------------------------------------------------------------------------------------------------------------------------------------------------------------------------------------------------------------------------------------------------------------------------------------------------------------------------------------------------------------------------------------------------------------------------------------------------------------------------------------------------------------------------------------------------------------------------------|
| Human ( <i>Homo Sapien</i> )                                                                                                                                                                                                                                                                                                                                                                                                                                                                                                                                                                                                                                                                                                                                                                                        | * * * * *<br>A R Y R C C R S Q S R S R Y Y R Q R Q R S R R R R R S C Q - - - - T R R R A M R C C R P R Y R P R C - - - - - R R H - - - -                                                                                                                                                                                                                                                                                                                                                                                                                                                                                                                                                                                                                                                                                                                                                                                                                                                                                                                                                                                                                                                                                                                                                                                                                                                                                                                                                                                                                                                                                                                                                                                                                                                                                                                                                                                                                                                                                                                             |
| <b>Monotremes</b>                                                                                                                                                                                                                                                                                                                                                                                                                                                                                                                                                                                                                                                                                                                                                                                                   |                                                                                                                                                                                                                                                                                                                                                                                                                                                                                                                                                                                                                                                                                                                                                                                                                                                                                                                                                                                                                                                                                                                                                                                                                                                                                                                                                                                                                                                                                                                                                                                                                                                                                                                                                                                                                                                                                                                                                                                                                                                                      |
| Duckbill platypus ( <i>Ornithorhynchus anatinus</i> )<br>Short-beaked echidna ( <i>Tachyglossus aculeatus</i> )                                                                                                                                                                                                                                                                                                                                                                                                                                                                                                                                                                                                                                                                                                     | * * * * *<br>A R F R R S R S R S R S L Y R R R R R S - - - - R R G G R Q T - - R S R K L S R - S R R R G R S R R R K G R R S R R S S R R S R R R N - - - - -<br>A R F R P S R S R S R S L Y R R R R R S R R Q R S R R R G G R Q T - - G P R K I T R R G R G R G K S R R R R G R R S M R S S R R R R R R R R N - - - - -                                                                                                                                                                                                                                                                                                                                                                                                                                                                                                                                                                                                                                                                                                                                                                                                                                                                                                                                                                                                                                                                                                                                                                                                                                                                                                                                                                                                                                                                                                                                                                                                                                                                                                                                              |
| <b>Birds</b>                                                                                                                                                                                                                                                                                                                                                                                                                                                                                                                                                                                                                                                                                                                                                                                                        |                                                                                                                                                                                                                                                                                                                                                                                                                                                                                                                                                                                                                                                                                                                                                                                                                                                                                                                                                                                                                                                                                                                                                                                                                                                                                                                                                                                                                                                                                                                                                                                                                                                                                                                                                                                                                                                                                                                                                                                                                                                                      |
| Chicken ( <i>Gallus gallus</i> )<br>Japanese quail ( <i>Coturnix japonica</i> )                                                                                                                                                                                                                                                                                                                                                                                                                                                                                                                                                                                                                                                                                                                                     | * * * * *<br>A R Y R R S R T R S R S P R S R R R R R R S G R R R S P R R R R Y G S A R R S R R S V G G - - - - R R R R Y G S R R R R R - - - - - R R Y<br>A R Y R R T R T R S R S R R R R R S R R R R - - - - - S S R R R R Y G R S R R S Y R S V G R - - - - - R R R R Y G R R R R R R - - - - - R R Y                                                                                                                                                                                                                                                                                                                                                                                                                                                                                                                                                                                                                                                                                                                                                                                                                                                                                                                                                                                                                                                                                                                                                                                                                                                                                                                                                                                                                                                                                                                                                                                                                                                                                                                                                              |
| <b>Reptiles</b>                                                                                                                                                                                                                                                                                                                                                                                                                                                                                                                                                                                                                                                                                                                                                                                                     |                                                                                                                                                                                                                                                                                                                                                                                                                                                                                                                                                                                                                                                                                                                                                                                                                                                                                                                                                                                                                                                                                                                                                                                                                                                                                                                                                                                                                                                                                                                                                                                                                                                                                                                                                                                                                                                                                                                                                                                                                                                                      |
| Western painted turtle ( <i>Chrysemys picta bellii</i> )<br>Painted turtle ( <i>Chrysemys picta</i> ) Tt II1<br>Painted turtle ( <i>Chrysemys picta</i> ) Tt II-2<br>Painted turtle ( <i>Chrysemys picta</i> ) Tt II3<br>Painted turtle ( <i>Chrysemys picta</i> ) Tt II-4<br>Painted turtle ( <i>Chrysemys picta</i> ) Tt II5<br>American alligator ( <i>Alligator mississippiensis</i> ) Al-1<br>American alligator ( <i>Alligator mississippiensis</i> ) Al-2<br>American alligator ( <i>Alligator mississippiensis</i> ) Al-3<br>Japanese toad ( <i>Bufo japonicus</i> )<br>Japanese toad ( <i>Bufo japonicus</i> )<br>Japanese fire-bellied newt ( <i>Cynops pyrrhogaster</i> )<br>Japanese fire-bellied newt ( <i>Cynops pyrrhogaster</i> )<br>Green anole, American chameleon ( <i>Anolis carolinensis</i> ) | * * * * *<br>A R Y R R N R S R S R S R R R R R R R G G R G G R R G R R R - - - - - R - R H - - - - - G Q R R R G R R G R E R T R R R R R R R R S S -<br>- - - - - R R R R R R R G G R G G R R G R R R - - - - - R - R H - - - - - G R R R R G R R S R E Q T R R R R R R R R R - -<br>- - - - - R R R R R R R G G R G G R R G R R R - - - - - R - R H - - - - - G R R R R G H R G R E R T R R R R R R R R S S - -<br>- - - - - R R R R R R R G G R G G R R G R R R - - - - - R - R H - - - - - G R R R R G R R G R E R T R R R R R R R R S S - -<br>- - - - - R R R R R R R G G R G G R S G R R R - - - - - R - R H - - - - - G R R R R G R R S R E Q T G R R R R R R R R R M S F<br>- - - - - R R R R R R R G G R G G R R G R R R - - - - - R - R H - - - - - G R R R R G R R S R E R T G R R R R R R R R R M S F<br>A R Y E R N R S R S R S R R - R R R W S N H G G R Y R R R R - - - - - T - R R S G G G R Y G Q R R H H R G S R R R R R R R R R - - -<br>A R Y R H N R S R S R S R H R R R R R G H R G G R Y R R R - - - - - - - - - - - - R R R G R Y G H R R H H R G H S R R R R K R R R S R H - - - - -<br>- - - - - R R R - R R R G G H G G G S Y R - - - - - - - - - - - - - - - - - - - - - - - - - - - - - - - - - - - - - - - - - -<br>P P - - - - - - - - - - - - - - - - - - - - - - - - - - - - - - - - - - - - - - - - - - - - - - - - - - - - - - - - - - - - - -<br>P P - - - - - - - - - - - - - - - - - - - - - - - - - - - - - - - - - - - - - - - - - - - - - - - - - - - - - - - - - - - - - -<br>- - M A R G R S R S R S V R R R R R G G S P R R R R R A G R - - - - - - - - - - - - - - - - - - - - - - - - - - - - - - - - - - -<br>- A Y G R A R S R G R S V R R R R R G R S P - - - - - - - - - - - - - - - - - - - - - - - - - - - - - - - - - - - - - - - - - -<br>- - - - - - - - - - - - - - - - - - - - - - - - - - - - - - - - - - - - - - - - - - - - - - - - - - - - - - - - - - - - - -<br>- - - - - R R R R R R R G R G H G G G K R R R G R - - - - - - - - - - - - - - - - - - - - - - - - - - - - - - - - - - - - - - - - - - |

**Supplemental Figure S2. Amino acid sequences of monotreme, bird and reptile protamine P1.** The sequences have been aligned relative to human protamine P1, and the epitopic sequences recognized by the new anti-protamine MAbs are highlighted to identify those protamines that are likely to be recognized. The epitopes recognized by 2A11, 5A2, 5D1, and 11C1 are highlighted in blue (SRS), gray (RQR), purple (TRR) and brown (RCC). The sequences recognized by MAb 20D4 are highlighted green (ARY) and yellow (RSCRRRRRSC, RSRRRRRRCR, and conserved variants). The YRP sequence recognized by MAb 26B11 is highlighted red. The protamines of the monotremes, birds and several reptiles for which we have sequences should be recognized by MAbs 2A11, 5A2, 5D1, and 11C1. MAb 20B4 would be expected to bind to protamines of birds and a number of reptiles.
